# Supplementary material for: A Beacon in the Dark: Grey Literature Data Mining and Machine Learning Enlightening Historical Plankton Seasonality Dynamics in the Ligurian Sea
Source: MDPI journal article supplement (doi:10.3390/d16030189), 2024-03-21
Supplement: s1 [file s1]

UNIVERSITA' DI GENOVA

ISTITUTO DI SCIENZE AMBIENTALI MARINE

Cattedra di Idrobiologia e Piscicoltura

Facoltà di Scienze Fisiche, Matematiche e Naturali

---

Fabiano M. - Medica D. - Ossola C. - Zunini Sertorio T.

Materiale particellato e zooplancton in acque superficiali

Chiavari : Marzo 1985 - Marzo 1986



## MATERIALE PARTICELLATO E ZOOPLANKTON IN ACQUE SUPERFICIALI

Chiavari: Marzo 1985 - Marzo 1986

Fabiano M. - Medica D. - Ossola C. - Zunini Sertorio T.

Il presente rapporto riguarda i parametri biologici ed idrologici rilevati in acque di superficie nella zona pilota di Chiavari (Riviera Ligure di Levante) durante un ciclo annuale.

Il campionamento è stato effettuato dal marzo 1985 al marzo 1986 su quattro stazioni fisse poste a diversa distanza dalla costa: Staz.A (44°15'1N - 9°13'6E) al largo del promontorio di Portofino sulla batimetria dei 230 m; Sta.B (44°16'2N - 9°14'5E) sulla batimetria dei 120 m; Staz.C (44°17'5N - 9°16'5E) sulla batimetria dei 75 m; Staz.D (44°18'2N - 9°18'2E) sulla batimetria dei 30 m (fig.1). Le stazioni A e D sono state visitate ad intervalli quindicinali, le stazioni B e C ad intervalli mensili.

I dati riportati sono relativi a: sostanza organica particellata, fosfati reattivi, biomasse planctoniche, popolamento zooplanctonico, misure idrologiche di salinità, temperatura e trasparenza e rilevamenti meteorologici.

### MATERIALE PARTICELLATO

In ogni stazione sono stati prelevati un litro d'acqua per l'analisi dei protidi particellati ed un litro per l'analisi dei carboidrati particellati. Tali campioni venivano conservati in frigorifero sino al momento della filtrazione. In laboratorio i campioni venivano filtrati su filtri Whatman GF/C in fibra di vetro ( $\varnothing$  2.5 cm) precedentemente calcinati in forno a 450° C per due ore. Quando l'analisi non veniva effettuata immediatamente il materiale era conservato alla temperatura di - 20 °C.

Il dosaggio dei protidi è stato effettuato secondo il metodo di Hartree, il contenuto dei glucidi è stato valutato secondo il metodo proposto da Dubois. Tali metodiche sono state trascritte in dettaglio nel rapporto tecnico n° 17 (1).

- 
- (1) CASSIANI L., DELLA CROCE N., FABIANO M., PALMERO S., ZAVATARELLI M., ZUNINI SERTORIO T. (1982). Lipidi, Protidi e Glucidi nel materiale particolato e nello zooplankton. (Chiavari): Aprile 1980 - Marzo 1981. Catt. Idrob. Pescic. Univ. Genova, Rapp. Tecn., 17, 8 pp.

L'analisi della distribuzione in classi dimensionali delle particelle sospese sulle stazioni A e D è stata effettuata utilizzando un Coulter Counter modello D. Per ciascuna classe dimensionale (2.71÷3.81, 3.81÷5.40, 5.40÷7.60, 7.60÷10.70, 10.70÷15.11, 15.11÷21.42, 21.42÷30.02, 30.02÷43.10, 43.10÷60.02, 60.02÷140.00  $\mu\text{m}$ ) è stato valutato sia il numero che il volume totale teorico delle particelle presenti.

### FOSFATI REATTIVI

I fosfati reattivi sono stati analizzati secondo il metodo riportato da Strickland e Parsons (2).

### BIOMASSA FITOPLANCTONICA

Per la valutazione della clorofilla-a sono stati prelevati 2 litri d'acqua su ogni stazione.

La determinazione della clorofilla-a è stata effettuata secondo Strickland e Parsons (2), con filtrazione su filtri Millipore ( $\phi$  0.8  $\mu\text{m}$ ) e lettura dell'estratto acetico allo spettrofotometro (Varian 635) con celle di 5 cm di passo ottico, utilizzando le formule SCOR-UNESCO per il calcolo delle concentrazioni.

### ZOOPLANCTON

Le pesche sono state effettuate ad intervalli quindicinali sulle stazioni A (fondale 200 m) e D (fondale 30 m).

I campioni sono stati raccolti con reti appaiate tipo "bongo" con apertura della bocca di 20 cm di diametro e maglie di 200  $\mu\text{m}$ , munite di flussometro della General Oceanics Inc. mod. 2030 applicato al centro della bocca della rete.

Le reti venivano trascinate in superficie per la durata di 20 minuti. Dei due campioni ottenuti uno veniva mantenuto vivo in un freezer portatile per non più di 5 ore fino all'arrivo in laboratorio ed utilizzato per le determinazioni di peso secco, carbonio ed azoto. Il secondo veniva conservato in formalina al 4% ed utilizzato per l'indagine qualitativa e quantitativa degli organismi.

---

(2) STRICKLAND J.D.H., PARSONS T.R. (1968). A practical handbook of seawater analysis. Bull. Fish. Res. Bd. Canada, 167, 311 pp.

**Biomassa zooplanctonica.** In laboratorio il campione fresco è stato filtrato su rete con maglia di 73  $\mu$ m, risciacquato con circa 100 ml di acqua deionizzata (3), ed infine posto in termostato a 60 °C fino al raggiungimento del peso costante (4).

Ottenuto il peso secco il campione è stato conservato a -20° C fino al momento della determinazione del carbonio e dell'azoto. A tale scopo il campione è stato scongelato e omogenato in un mortaio con un pestello, entrambi di vetro; da questo è stato prelevato un subcampione (0.5 ÷ 1.8 mg) per l'analisi mediante Analizzatore Automatico Mod.1106 della Carlo Erba. Come standard si è utilizzato cicloesano.

**Analisi del popolamento.** Per l'analisi qualitativa e quantitativa degli organismi i campioni di plancton sono stati portati a volume costante (500 ml); dopo omogeneizzazione sono stati prelevati dei subcampioni di volume noto in quantità sufficiente a definire tassonomicamente non meno di 100 Copepodi (solo in alcuni campioni di Agosto, Settembre ed Ottobre il conteggio si è fermato a cinquanta Copepodi a causa del loro scarso numero).

L'esame sistematico è stato condotto al genere per i Copepodi; in caso di difficoltà le forme immature sono state classificate come copepoditi. Le altre forme zooplanctoniche sono state raggruppate in categorie tassonomiche più elevate.

#### PARAMETRI IDROLOGICI

La determinazione della salinità è stata effettuata utilizzando un salinometro Plessey. La temperatura superficiale dell'acqua è stata rilevata con termometro a pozzetto e la trasparenza mediante il disco di Secchi.

#### DATI METEOROLOGICI

Le misure di interesse specifico sono state estratte dai registri dell'Osservatorio meteorologico-sismico di Chiavari.

---

(3) OMORI M. (1978). Some factors affecting on dry weight, organic weight and concentrations of carbon and nitrogen in freshly prepared and in preserved zooplankton. Int. Revue ges. Hydrobiol., 63 (2), 261-269.

(4) LOVEGROVE F. (1966). The determination of the dry weight of plankton and the effects of various factors on the values obtained. In: "Some contemporary studies in Marine Sciences" (H. Barnes ed.), 429-467. George Allen and Unwin Ltd, London.

## RINGRAZIAMENTI

Si è grati al direttore dell'Istituto di Scienze Ambientali Marine, Prof. Norberto Della Croce, per avere permesso i campionamenti in concomitanza con quelli eseguiti nell'ambito della ricerca "Valutazione degli stocks di acciughe e parametri ambientali in Mar Ligure" promossa dal Ministero della Marina Mercantile, contratto n°6224398.

Si ringrazia altresì vivamente il Prof. don L. Leonardini, direttore dell'Osservatorio meteorologico-sismico di Chiavari, per la gentile collaborazione.

## PRESENTAZIONE DELLE TABELLE

- BIOMASSA FITOPLANCTONICA (chl-a), PROTIDI PARTICELLATI (pprt), CARBOIDRATI PARTICELLATI (pcho), FOSFATI (P-PO<sub>4</sub>) e PARAMETRI IDROLOGICI. Con il simbolo < si indicano le concentrazioni di fosforo inferiori al limite di sensibilità del metodo usato. Con il simbolo - si indica la mancanza del dato (pagg. 5-6).
- NUMERO DELLE PARTICELLE per classi dimensionali espresse in  $\mu\text{m}$  e VOLUME TOTALE TEORICO delle particelle ( $\mu\text{mc}$ ) presenti per classi dimensionali (pagg. 7-8).
- BIOMASSA ZOOPLANCTONICA (peso secco in grammi), PERCENTUALI DI CARBONIO E AZOTO (% C, % N), RAPPORTO CARBONIO/AZOTO IN PESO (C/N). Con il simbolo - si indica la mancanza del dato (pag. 9).
- GRUPPI ZOOPLANCTONICI identificati e NUMERO DI ORGANISMI conteggiati nei subcampioni (cc) (pagg. 10-11).
- DATI METEOROLOGICI. La temperatura dell'aria in °C viene espressa come media tra minima e massima; l'insolazione in ore e decimi di ora; la nebulosità in decimi di cielo coperto; la pluviometria in mm di pioggia e neve fusa. Questi dati si riferiscono ai giorni di campionamento, nonché alle decadi mensili ed alla loro media. La pluviometria viene espressa come quantità totale per decade e mese (pag. 12).

## STAZIONE A

| data     | trasp.<br>m | temp.<br>°C | sal.<br>‰ | P-PO4<br>µg at/l | chl-a<br>µg/l | pprt<br>µg/l | pcho<br>µg/l |
|----------|-------------|-------------|-----------|------------------|---------------|--------------|--------------|
| 21.03.85 | 7.0         | 13.0        | -         | 0.08             | 0.49          | 139.7        | 191.4        |
| 04.04.85 | 14.0        | 13.8        | 36.634    | 0.06             | 0.51          | 116.6        | 207.5        |
| 22.04.85 | 27.0        | 14.6        | 38.104    | 0.13             | 0.26          | 54.3         | 304.4        |
| 15.05.85 | 24.0        | 15.8        | 37.807    | 0.11             | 0.54          | 101.8        | 85.0         |
| 30.05.85 | 30.0        | 19.1        | 37.894    | 0.21             | 0.30          | 72.4         | 29.1         |
| 17.06.85 | 10.0        | 20.5        | 37.948    | 0.04             | 0.20          | 60.4         | 69.8         |
| 26.06.85 | 29.5        | 19.7        | 37.825    | 0.15             | 0.50          | 57.3         | 23.3         |
| 15.07.85 | 31.0        | 24.5        | 37.706    | 0.05             | 0.74          | 68.0         | 31.6         |
| 30.07.85 | 25.0        | 25.0        | 37.772    | 0.15             | 0.73          | 42.4         | 46.8         |
| 13.08.85 | 34.5        | 23.9        | 37.923    | 0.11             | 0.58          | 61.9         | 42.9         |
| 28.08.85 | 34.5        | 23.6        | 37.878    | 0.03             | 0.52          | 42.7         | 75.4         |
| 10.09.85 | 34.0        | 23.0        | 38.036    | 0.03             | 0.38          | 44.4         | 39.6         |
| 01.10.85 | 37.0        | 23.8        | 37.839    | 0.10             | 0.36          | 28.1         | 27.1         |
| 17.10.85 | 30.5        | 22.5        | 37.946    | <                | 0.25          | 91.1         | 120.4        |
| 15.11.85 | 27.0        | 17.5        | 38.120    | 0.05             | 0.40          | 68.3         | 46.2         |
| 26.11.85 | 20.0        | 16.5        | 37.965    | <                | 0.35          | 41.3         | 21.7         |
| 10.12.85 | 13.0        | 15.0        | 37.282    | 0.17             | 0.77          | 55.7         | 52.4         |
| 20.12.85 | 23.5        | 15.8        | 37.848    | 0.09             | 0.70          | 54.0         | 40.8         |
| 13.01.86 | 20.5        | 14.4        | 37.850    | 0.14             | 0.73          | 42.0         | 35.4         |
| 28.01.86 | 17.0        | 13.0        | 38.024    | 0.04             | 0.62          | 39.4         | 49.5         |
| 13.02.86 | 13.0        | 13.3        | 37.988    | 0.23             | 1.00          | 60.1         | 55.3         |
| 25.02.86 | 10.0        | 12.8        | 37.671    | 0.17             | 1.25          | 45.5         | 67.7         |
| 11.03.86 | 6.0         | 12.5        | 36.413    | 0.13             | 2.65          | 112.6        | 118.9        |
| 26.03.86 | 8.5         | 12.9        | 37.469    | 0.05             | 0.82          | 77.0         | 117.4        |

## STAZIONE B

| data     | trasp.<br>m | temp.<br>°C | sal.<br>‰ | P-PO4<br>µg at/l | chl-a<br>µg/l | pprt<br>µg/l | pcho<br>µg/l |
|----------|-------------|-------------|-----------|------------------|---------------|--------------|--------------|
| 21.03.85 | 6.5         | 12.6        | -         | 0.10             | 0.65          | -            | -            |
| 04.04.85 | 15.0        | 14.2        | 37.019    | 0.06             | 0.50          | 98.1         | 129.1        |
| 15.05.85 | 13.0        | 16.2        | 37.564    | 0.05             | 0.76          | 86.7         | 58.7         |
| 17.06.85 | 9.0         | 20.7        | 37.809    | 0.03             | 0.31          | 110.7        | 43.6         |
| 15.07.85 | 26.0        | 24.7        | 37.734    | 0.03             | 0.79          | 48.0         | -            |
| 13.08.85 | 31.5        | 23.1        | 37.496    | 0.16             | 0.45          | 26.5         | 63.9         |
| 10.09.85 | 29.5        | 23.0        | 38.081    | 0.08             | 0.45          | 38.7         | 48.5         |
| 17.10.86 | 27.0        | 22.5        | 38.010    | 0.04             | 0.16          | 70.5         | 47.1         |
| 26.11.86 | 20.0        | 16.6        | 38.024    | 0.01             | 0.21          | 44.8         | 34.3         |
| 20.12.86 | 23.0        | 15.9        | 37.852    | 0.08             | 0.44          | 42.7         | 50.9         |
| 13.02.86 | 8.5         | 12.9        | 37.862    | 0.14             | 1.30          | 31.9         | 115.5        |
| 11.03.86 | 7.0         | 12.4        | 36.100    | 0.07             | 2.81          | 162.2        | 95.2         |

## STAZIONE C

| data     | trasp.<br>m | temp.<br>°C | sal.<br>‰ | P-PO4<br>µg at/l | chl-a<br>µg/l | pprt<br>µg/l | pcho<br>µg/l |
|----------|-------------|-------------|-----------|------------------|---------------|--------------|--------------|
| 21.03.85 | 6.0         | 12.9        | -         | 0.08             | 0.58          | 67.9         | 61.5         |
| 22.04.85 | 18.0        | 14.9        | 37.819    | 0.15             | 0.33          | 54.6         | 52.7         |
| 30.05.85 | 20.5        | 20.3        | 37.082    | 0.05             | 0.43          | 110.7        | 49.9         |
| 26.06.85 | 19.0        | 20.9        | 37.834    | 0.13             | 0.87          | 102.2        | 54.3         |
| 30.07.85 | 24.0        | 25.0        | 37.473    | 0.04             | 0.59          | 37.1         | 123.4        |
| 28.08.85 | 26.5        | 24.3        | 37.698    | 0.06             | 0.74          | 47.7         | 70.4         |
| 01.10.85 | 24.5        | 24.0        | 37.955    | 0.06             | 0.47          | 36.4         | 64.9         |
| 15.11.85 | 4.5         | 17.7        | 37.813    | <                | 0.40          | 56.2         | 47.8         |
| 10.12.85 | 13.5        | 15.3        | 37.730    | 0.14             | 0.55          | 57.4         | 29.9         |
| 13.01.86 | 6.0         | 13.5        | 37.440    | 0.13             | 1.33          | 64.5         | 94.5         |
| 28.01.86 | 12.0        | 13.3        | 37.874    | 0.21             | 1.08          | 57.7         | 43.0         |
| 13.02.86 | 5.5         | 12.1        | 36.342    | 0.34             | 1.66          | 76.0         | 61.4         |
| 26.03.86 | 4.0         | 13.2        | 36.690    | 0.27             | 1.01          | 113.9        | 88.2         |

## STAZIONE D

| data     | trasp.<br>m | temp.<br>°C | sal.<br>‰ | P-PO4<br>µg at/l | chl-a<br>µg/l | pprt<br>µg/l | pcho<br>µg/l |
|----------|-------------|-------------|-----------|------------------|---------------|--------------|--------------|
| 21.03.85 | 5.5         | 13.0        | -         | 0.11             | 0.47          | 78.1         | 234.9        |
| 04.04.85 | 11.0        | 14.4        | 36.171    | 0.11             | 0.57          | 115.7        | 351.0        |
| 22.04.85 | 12.0        | 14.8        | 37.955    | 0.11             | 0.55          | 60.4         | 161.9        |
| 15.05.85 | 7.5         | 16.5        | 36.224    | 0.15             | 0.63          | 109.3        | 67.0         |
| 30.05.85 | 16.5        | 20.7        | 36.719    | 0.06             | 0.40          | 147.1        | 85.5         |
| 17.06.85 | 9.0         | 21.5        | 37.156    | 0.13             | 0.21          | 96.4         | 39.3         |
| 26.06.85 | 20.0        | 20.9        | 37.431    | 0.06             | 1.20          | 86.2         | 50.6         |
| 15.07.85 | 25.0        | 24.7        | 37.796    | 0.13             | 0.69          | 74.2         | 26.5         |
| 30.07.85 | 22.0        | 25.4        | 37.758    | 0.03             | 0.50          | 55.0         | 40.6         |
| 13.08.85 | 24.5        | 24.1        | 37.927    | 0.06             | 0.58          | 65.6         | 56.2         |
| 28.08.85 | 20.0        | 24.6        | 37.857    | 0.13             | 0.69          | 53.0         | 64.2         |
| 10.09.85 | 19.0        | 23.0        | 37.952    | 0.07             | 0.53          | 39.1         | 41.1         |
| 01.10.85 | 17.5        | 24.0        | 37.933    | 0.03             | 0.81          | 74.2         | 85.0         |
| 17.10.85 | 22.0        | 22.3        | 37.971    | <                | 0.46          | 93.0         | 85.8         |
| 15.11.85 | 6.0         | 17.9        | 37.957    | 0.06             | 0.45          | 69.5         | 53.6         |
| 26.11.85 | 11.5        | 16.4        | 38.007    | 0.06             | 0.47          | 56.2         | 14.1         |
| 10.12.85 | 10.0        | 15.4        | 37.461    | 0.10             | 1.24          | 86.2         | 53.7         |
| 20.12.85 | 11.5        | 15.4        | 37.429    | 0.15             | 0.96          | 93.7         | 80.7         |
| 13.01.86 | 3.5         | 13.0        | 36.264    | 0.25             | 1.08          | 64.3         | 106.4        |
| 28.01.86 | 8.0         | 13.2        | 37.783    | 0.09             | 1.15          | 78.4         | 38.6         |
| 13.02.86 | 7.0         | 12.8        | 37.403    | 0.11             | 1.57          | 52.6         | 60.8         |
| 25.02.86 | 6.0         | 12.0        | 36.114    | 0.28             | 1.65          | 95.0         | 66.1         |
| 11.03.86 | 6.0         | 12.5        | 35.991    | 0.10             | 2.09          | 126.3        | 110.1        |
| 26.03.86 | 4.0         | 13.4        | 36.807    | 0.23             | 0.67          | 103.2        | 75.7         |

STAZIONE A - Numero delle particelle per classi dimensionali espresse in  $\mu\text{m}$

| data     | 2.71     | 3.81    | 5.40    | 7.60    | 10.70  | 15.11 | 21.42 | 30.02 | 43.10 | 60.02  |
|----------|----------|---------|---------|---------|--------|-------|-------|-------|-------|--------|
|          | 3.81     | 5.40    | 7.60    | 10.70   | 15.11  | 21.42 | 30.02 | 43.10 | 60.02 | 140.00 |
| 21.03.85 | 7235.50  | 2662.00 | 781.25  | 202.58  | 57.50  | 25.42 | 8.38  | 1.38  | 0.50  | 0.00   |
| 04.04.85 | 1789.50  | 933.25  | 394.50  | 204.08  | 66.83  | 22.46 | 6.75  | 0.75  | 0.25  | 0.13   |
| 22.04.85 | 22948.00 | 4419.50 | 1083.50 | 861.75  | 327.58 | 72.92 | 5.75  | 0.63  | 0.25  | 2.13   |
| 15.05.85 | 3278.00  | 1153.50 | 414.50  | 195.75  | 68.92  | 33.33 | 10.13 | 1.25  | 0.63  | 0.00   |
| 30.05.85 | 1595.00  | 604.50  | 213.00  | 88.00   | 21.88  | 7.63  | 2.13  | 0.25  | 0.00  | 0.13   |
| 17.06.85 | 2466.50  | 664.50  | 221.50  | 88.83   | 32.54  | 5.00  | 3.38  | 0.38  | 0.38  | 0.00   |
| 26.06.85 | 4227.50  | 1555.25 | 328.75  | 97.50   | 34.50  | 15.63 | 5.88  | 1.38  | 0.13  | 0.00   |
| 15.07.85 | 3720.50  | 1779.00 | 690.00  | 273.50  | 65.83  | 12.29 | 2.13  | 1.13  | 0.38  | 0.25   |
| 30.07.85 | 4294.50  | 804.25  | 138.42  | 43.83   | 24.13  | 7.63  | 1.50  | 0.25  | 0.00  | 0.00   |
| 13.08.85 | 6541.50  | 1380.25 | 182.42  | 48.83   | 25.33  | 9.42  | 3.13  | 0.38  | 0.25  | 0.00   |
| 28.08.85 | 4469.50  | 948.25  | 201.00  | 74.08   | 42.83  | 14.71 | 2.63  | 0.38  | 0.13  | 0.00   |
| 10.09.85 | 4072.50  | 2100.75 | 552.58  | 66.17   | 16.88  | 6.13  | 0.63  | 0.13  | 0.00  | 0.25   |
| 01.10.85 | 2024.25  | 451.25  | 78.83   | 40.33   | 18.83  | 12.50 | 2.00  | 0.50  | 0.00  | 0.00   |
| 17.10.85 | 5931.75  | 600.50  | 135.42  | 40.00   | 9.96   | 9.38  | 1.38  | 0.13  | 0.00  | 0.00   |
| 15.11.85 | 4100.00  | 623.50  | 58.00   | 69.00   | 29.83  | 10.79 | 3.50  | 0.75  | 0.13  | 0.00   |
| 26.11.85 | 5505.50  | 795.50  | 158.83  | 48.83   | 25.83  | 8.63  | 1.88  | 0.50  | 0.00  | 0.00   |
| 10.12.85 | 3044.00  | 803.25  | 236.75  | 59.33   | 15.42  | 4.13  | 1.63  | 0.50  | 0.00  | 0.00   |
| 20.12.85 | 3875.00  | 1341.50 | 464.00  | 178.33  | 41.67  | 11.63 | 2.88  | 0.63  | 0.13  | 0.25   |
| 13.01.86 | 4682.00  | 3860.00 | 1247.75 | 254.42  | 54.50  | 23.71 | 5.63  | 0.50  | 0.00  | 0.00   |
| 28.01.86 | 4979.50  | 1926.50 | 588.75  | 164.75  | 45.50  | 22.38 | 2.75  | 0.88  | 0.00  | 0.00   |
| 13.02.86 | 2956.00  | 1191.50 | 386.50  | 95.17   | 30.17  | 13.92 | 4.13  | 2.13  | 0.00  | 0.00   |
| 25.02.86 | 5831.00  | 1738.75 | 495.25  | 127.67  | 25.50  | 10.21 | 0.75  | 0.38  | 0.00  | 0.00   |
| 11.03.86 | 5236.50  | 1787.50 | 732.50  | 229.33  | 32.29  | 8.88  | 1.88  | 0.00  | 0.13  | 0.00   |
| 26.03.86 | 12060.50 | 9159.50 | 4297.50 | 1363.25 | 217.92 | 49.08 | 10.75 | 2.50  | 1.00  | 0.00   |

STAZIONE A - Volume totale teorico delle particelle ( $\mu\text{mc}$ ) per classi dimensionali espresse in  $\mu\text{m}$

| data     | 2.71   | 3.81   | 5.40   | 7.60   | 10.70  | 15.11  | 21.42 | 30.02 | 43.10 | 60.02  |
|----------|--------|--------|--------|--------|--------|--------|-------|-------|-------|--------|
|          | 3.81   | 5.40   | 7.60   | 10.70  | 15.11  | 21.42  | 30.02 | 43.10 | 60.02 | 140.00 |
| 21.03.85 | 125681 | 130065 | 107547 | 77785  | 61892  | 77500  | 71546 | 33629 | 34445 | 0      |
| 04.04.85 | 31084  | 45599  | 54307  | 78361  | 71935  | 68475  | 57630 | 18276 | 17223 | 52430  |
| 22.04.85 | 398607 | 215937 | 149155 | 330886 | 352604 | 222316 | 49092 | 15352 | 17223 | 859042 |
| 15.05.85 | 56939  | 56360  | 57060  | 75162  | 74185  | 101616 | 86488 | 30461 | 43401 | 0      |
| 30.05.85 | 27705  | 29536  | 29322  | 33789  | 23551  | 23262  | 18185 | 6092  | 0     | 52430  |
| 17.06.85 | 42843  | 32467  | 30492  | 34108  | 35026  | 15244  | 28858 | 9260  | 26178 | 0      |
| 26.06.85 | 73432  | 75990  | 45256  | 37437  | 37135  | 47652  | 50202 | 33629 | 8956  | 0      |
| 15.07.85 | 64625  | 86922  | 94985  | 105016 | 70859  | 37469  | 18185 | 27537 | 26178 | 100826 |
| 30.07.85 | 74595  | 39296  | 19055  | 16829  | 25973  | 23262  | 12807 | 6092  | 0     | 0      |
| 13.08.85 | 113626 | 67439  | 25112  | 18749  | 27265  | 28719  | 26723 | 9260  | 17223 | 0      |
| 28.08.85 | 77635  | 46331  | 27670  | 28444  | 46102  | 44847  | 22454 | 9260  | 8956  | 0      |
| 10.09.85 | 70739  | 102443 | 76068  | 25407  | 18169  | 18689  | 5379  | 3168  | 0     | 100826 |
| 01.10.85 | 35161  | 22048  | 10852  | 15486  | 20268  | 38110  | 17076 | 12184 | 0     | 0      |
| 17.10.85 | 103034 | 29340  | 18642  | 15359  | 10721  | 28597  | 11782 | 3168  | 0     | 0      |
| 15.11.85 | 71217  | 30464  | 7984   | 26494  | 32109  | 32896  | 29882 | 18276 | 8956  | 0      |
| 26.11.85 | 95631  | 38868  | 21865  | 18749  | 27803  | 26311  | 16051 | 12184 | 0     | 0      |
| 10.12.85 | 52874  | 39247  | 32591  | 22781  | 16598  | 12591  | 13917 | 12184 | 0     | 0      |
| 20.12.85 | 67309  | 65546  | 63874  | 68473  | 44853  | 35457  | 24589 | 15352 | 9956  | 100826 |
| 13.01.86 | 81326  | 188600 | 171765 | 97690  | 58663  | 72266  | 48068 | 12184 | 0     | 0      |
| 28.01.86 | 86494  | 94129  | 81047  | 63259  | 48976  | 68231  | 23479 | 21444 | 0     | 0      |
| 13.02.86 | 51346  | 58217  | 53206  | 36542  | 32475  | 42439  | 35261 | 51905 | 0     | 0      |
| 25.02.86 | 101284 | 84955  | 68176  | 49021  | 27448  | 31128  | 6403  | 9260  | 0     | 0      |
| 11.03.86 | 90958  | 87337  | 100836 | 88056  | 34757  | 27073  | 16051 | 0     | 8956  | 0      |
| 26.03.86 | 209491 | 447533 | 591594 | 523447 | 234567 | 149634 | 91781 | 60922 | 68890 | 0      |

STAZIONE D - Numero delle particelle per classi dimensionali espresse in  $\mu m$ 

| data     | 2.71<br>3.81 | 3.81<br>5.40 | 5.40<br>7.60 | 7.60<br>10.70 | 10.70<br>15.11 | 15.11<br>21.42 | 21.42<br>30.02 | 30.02<br>43.10 | 43.10<br>60.02 | 60.02<br>140.00 |
|----------|--------------|--------------|--------------|---------------|----------------|----------------|----------------|----------------|----------------|-----------------|
| 21.03.85 | 5203.00      | 2116.50      | 736.00       | 247.50        | 67.17          | 35.71          | 4.88           | 0.25           | 0.63           | 0.38            |
| 04.04.85 | 84750.50     | 2221.50      | 704.50       | 280.50        | 89.00          | 39.00          | 10.50          | 2.13           | 0.25           | 0.13            |
| 22.04.85 | 19458.50     | 6801.00      | 3651.50      | 2277.25       | 358.25         | 52.63          | 6.63           | 1.75           | 0.00           | 0.00            |
| 15.05.85 | 7015.00      | 2726.50      | 758.75       | 290.08        | 63.33          | 19.83          | 7.25           | 0.38           | 1.13           | 0.25            |
| 30.05.85 | 5096.00      | 1580.25      | 498.50       | 157.92        | 45.50          | 17.83          | 4.75           | 1.75           | 0.38           | 0.13            |
| 17.06.85 | 3203.50      | 859.25       | 299.00       | 110.92        | 30.67          | 11.17          | 1.88           | 0.50           | 0.13           | 0.00            |
| 26.06.85 | 2374.50      | 796.00       | 253.50       | 130.17        | 34.00          | 8.21           | 3.25           | 0.25           | 0.00           | 0.13            |
| 15.07.85 | 4071.50      | 851.25       | 217.75       | 88.00         | 28.17          | 10.08          | 3.13           | 0.50           | 0.00           | 0.13            |
| 30.07.85 | 6041.50      | 2053.25      | 437.00       | 171.42        | 49.50          | 11.46          | 0.88           | 0.75           | 0.25           | 0.00            |
| 13.08.85 | 9397.00      | 1902.75      | 179.50       | 76.92         | 30.50          | 11.08          | 6.00           | 1.13           | 0.13           | 0.00            |
| 28.08.85 | 3435.50      | 844.50       | 201.83       | 60.33         | 24.46          | 7.50           | 2.00           | 0.88           | 0.00           | 0.00            |
| 10.09.85 | 2030.25      | 427.75       | 92.50        | 38.83         | 26.33          | 16.71          | 4.38           | 0.25           | 0.00           | 0.00            |
| 01.10.85 | 4333.50      | 2010.50      | 787.50       | 248.75        | 67.25          | 31.57          | 7.80           | 3.50           | 0.13           | 0.00            |
| 17.10.85 | 3594.50      | 934.00       | 187.25       | 66.92         | 33.17          | 12.79          | 3.00           | 0.88           | 0.00           | 0.00            |
| 15.11.85 | 6784.50      | 3959.00      | 859.00       | 336.75        | 90.42          | 27.08          | 6.50           | 2.25           | 1.00           | 0.00            |
| 26.11.85 | 8634.00      | 1010.00      | 214.00       | 84.00         | 28.67          | 8.96           | 2.00           | 0.88           | 0.00           | 0.00            |
| 10.12.85 | 11557.00     | 5546.00      | 1379.25      | 416.25        | 104.17         | 48.00          | 15.08          | 1.50           | 0.50           | 0.25            |
| 20.12.85 | 5021.00      | 1761.25      | 540.75       | 215.50        | 37.83          | 10.67          | 1.50           | 0.25           | 0.25           | 0.00            |
| 13.01.86 | 11434.50     | 4492.50      | 1008.75      | 204.25        | 34.83          | 9.17           | 2.63           | 0.75           | 0.00           | 0.13            |
| 28.01.86 | 3501.00      | 1516.50      | 459.75       | 168.08        | 26.50          | 15.54          | 1.00           | 0.63           | 0.00           | 0.00            |
| 13.02.86 | 3778.50      | 1240.25      | 337.00       | 100.75        | 15.88          | 5.50           | 0.63           | 0.38           | 0.00           | 0.13            |
| 25.02.86 | 5843.00      | 2189.00      | 905.75       | 258.08        | 65.50          | 17.79          | 2.88           | 1.00           | 0.00           | 0.00            |
| 11.03.86 | 4655.50      | 1966.75      | 620.50       | 291.25        | 61.33          | 20.67          | 4.50           | 2.00           | 0.38           | 0.13            |
| 26.03.86 | 10828.00     | 3703.00      | 1163.75      | 392.25        | 56.50          | 25.63          | 5.50           | 1.75           | 1.00           | 0.13            |

STAZIONE D - Volume totale teorico delle particelle ( $\mu mc$ ) per classi dimensionali espresse in  $\mu m$ 

| data     | 2.71<br>3.81 | 3.81<br>5.40 | 5.40<br>7.60 | 7.60<br>10.70 | 10.70<br>15.11 | 15.11<br>21.42 | 21.42<br>30.02 | 30.02<br>43.10 | 43.10<br>60.02 | 60.02<br>140.00 |
|----------|--------------|--------------|--------------|---------------|----------------|----------------|----------------|----------------|----------------|-----------------|
| 21.03.85 | 90376        | 103412       | 101318       | 95033         | 72301          | 108872         | 41664          | 6092           | 43401          | 153256          |
| 04.04.85 | 1472116      | 108542       | 96981        | 107704        | 95799          | 118902         | 89646          | 51905          | 17223          | 52430           |
| 22.04.85 | 337994       | 332297       | 502665       | 874396        | 385617         | 160457         | 56605          | 42645          | 0              | 0               |
| 15.05.85 | 121851       | 133217       | 104450       | 111382        | 68168          | 60457          | 61899          | 9260           | 77846          | 100826          |
| 30.05.85 | 88518        | 77211        | 68624        | 60637         | 48976          | 54360          | 40554          | 42645          | 26178          | 52430           |
| 17.06.85 | 55645        | 41983        | 41160        | 42590         | 33013          | 34055          | 16051          | 12184          | 8956           | 0               |
| 26.06.85 | 41245        | 38893        | 34897        | 49981         | 36597          | 25030          | 27748          | 6092           | 0              | 52430           |
| 15.07.85 | 70722        | 41592        | 29975        | 33789         | 30322          | 30732          | 26723          | 12184          | 0              | 52430           |
| 30.07.85 | 104941       | 100322       | 60157        | 65820         | 53281          | 34939          | 7513           | 18276          | 17223          | 0               |
| 13.08.85 | 163226       | 92968        | 24710        | 29535         | 32830          | 33780          | 51227          | 27537          | 8956           | 0               |
| 28.08.85 | 59675        | 41262        | 27784        | 23165         | 26328          | 22866          | 17076          | 21444          | 0              | 0               |
| 10.09.85 | 35265        | 20900        | 12734        | 14910         | 28341          | 50945          | 37395          | 6092           | 0              | 0               |
| 01.10.85 | 75273        | 98233        | 108407       | 95513         | 72387          | 96250          | 66595          | 85290          | 8956           | 0               |
| 17.10.85 | 62436        | 45635        | 25777        | 25695         | 35704          | 38994          | 25613          | 21444          | 0              | 0               |
| 15.11.85 | 117847       | 193437       | 118250       | 129302        | 97327          | 82561          | 55495          | 54829          | 68890          | 0               |
| 26.11.85 | 149973       | 49349        | 29459        | 32253         | 30860          | 27317          | 17076          | 21444          | 0              | 0               |
| 10.12.85 | 200745       | 270978       | 189868       | 159828        | 112128         | 146341         | 128749         | 36553          | 34445          | 100826          |
| 20.12.85 | 87215        | 86055        | 74440        | 82746         | 40720          | 32530          | 12807          | 6092           | 17223          | 0               |
| 13.01.86 | 198617       | 219504       | 138865       | 78426         | 37491          | 27957          | 22454          | 18276          | 0              | 52430           |
| 28.01.86 | 60812        | 74096        | 63289        | 64538         | 28524          | 47378          | 8538           | 15352          | 0              | 0               |
| 13.02.86 | 65633        | 60599        | 46391        | 38685         | 17093          | 16768          | 5379           | 9260           | 0              | 52430           |
| 25.02.86 | 101493       | 106955       | 124686       | 99095         | 70504          | 54238          | 24589          | 24369          | 0              | 0               |
| 11.03.86 | 80866        | 96095        | 85418        | 111831        | 66015          | 63018          | 38420          | 48737          | 26178          | 52430           |
| 26.03.86 | 188082       | 180929       | 160202       | 150612        | 60816          | 78140          | 46958          | 42645          | 68890          | 52430           |

## STAZIONE A

| data     | metri cubi<br>filtrati | peso secco<br>g | C<br>% | N<br>% | C/N<br>in peso |
|----------|------------------------|-----------------|--------|--------|----------------|
| 21.03.85 | 41.45                  | 0.0665          | 45.9   | 10.5   | 4.37           |
| 04.04.85 | 5.77                   | 0.1818          | 34.3   | 7.9    | 4.34           |
| 22.04.85 | 46.87                  | 0.1601          | 34.2   | 7.3    | 4.68           |
| 15.05.85 | 41.40                  | 0.1733          | 37.3   | 8.3    | 4.49           |
| 30.05.85 | 39.38                  | 0.3748          | 34.3   | 6.5    | 5.29           |
| 17.06.85 | 47.56                  | 0.5200          | 46.3   | 10.1   | 4.58           |
| 26.06.85 | 57.53                  | 0.2018          | 24.8   | 4.7    | 5.28           |
| 15.07.85 | 51.66                  | 0.3139          | 39.1   | 7.2    | 5.43           |
| 30.07.85 | 50.91                  | 0.0965          | 30.4   | 5.3    | 5.74           |
| 13.08.85 | 53.68                  | 0.3056          | 31.6   | 5.7    | 5.54           |
| 28.08.85 | 53.20                  | 0.0800          | 36.5   | 8.0    | 4.56           |
| 10.09.85 | 54.52                  | 0.0645          | 33.4   | 5.8    | 5.76           |
| 01.10.85 | 58.54                  | 0.0991          | 36.2   | 5.1    | 7.10           |
| 17.10.85 | 57.20                  | 0.0853          | 24.6   | 3.9    | 6.31           |
| 30.10.85 | 48.78                  | 0.1205          | 24.7   | 4.8    | 5.15           |
| 15.11.85 | 53.32                  | 0.1781          | 38.6   | 8.3    | 4.65           |
| 26.11.85 | 54.83                  | 0.0711          | 28.1   | 5.6    | 5.02           |
| 10.12.85 | 49.21                  | 0.5481          | 39.6   | -      | -              |
| 20.12.85 | 48.55                  | 0.9625          | 31.5   | 6.6    | 4.77           |
| 13.01.86 | 54.15                  | 0.0619          | 29.2   | 5.8    | 5.03           |
| 28.01.86 | 32.27                  | 0.0777          | 32.6   | 6.7    | 4.87           |
| 13.02.86 | 48.73                  | 0.0467          | 36.2   | 6.8    | 5.32           |
| 25.02.86 | 49.05                  | 0.0731          | 22.0   | 3.7    | 5.95           |
| 11.03.86 | 10.67                  | 0.2641          | 14.3   | 2.2    | 6.50           |
| 26.03.86 | 19.23                  | 0.1992          | 26.8   | 4.8    | 5.58           |

## STAZIONE D

| data     | metri cubi<br>filtrati | peso secco<br>g | C<br>% | N<br>% | C/N<br>in peso |
|----------|------------------------|-----------------|--------|--------|----------------|
| 21.03.85 | 53.85                  | 0.0689          | 35.7   | 7.9    | 4.52           |
| 04.04.85 | 13.32                  | 0.7581          | 45.4   | 10.3   | 4.41           |
| 22.04.85 | 41.56                  | 0.0171          | 39.1   | 8.6    | 4.55           |
| 15.05.85 | 39.78                  | 0.4558          | 41.7   | 8.6    | 4.85           |
| 30.05.85 | 21.54                  | 1.0834          | 42.2   | 8.6    | 4.91           |
| 17.06.85 | 42.92                  | 0.7550          | 43.0   | 9.3    | 4.62           |
| 26.06.85 | 61.16                  | 0.6850          | 33.5   | 7.7    | 4.35           |
| 15.07.85 | 53.90                  | 0.1651          | 36.7   | 7.3    | 5.03           |
| 30.07.85 | 48.36                  | 0.1767          | 33.1   | 6.7    | 4.94           |
| 13.08.85 | 41.45                  | 0.2507          | 31.0   | 5.8    | 5.34           |
| 28.08.85 | 42.72                  | 0.2581          | 34.3   | 7.2    | 4.76           |
| 10.09.85 | 27.95                  | 0.1964          | 36.0   | 7.1    | 5.07           |
| 01.10.85 | 21.00                  | 0.1958          | 42.9   | 7.7    | 5.57           |
| 17.10.85 | 26.44                  | 0.3490          | 37.3   | 6.4    | 5.83           |
| 30.10.85 | 52.81                  | 0.2974          | 29.0   | 6.0    | 4.83           |
| 15.11.85 | 52.65                  | 0.1783          | 39.2   | 7.9    | 4.96           |
| 26.11.85 | 48.60                  | 0.0764          | 37.4   | 9.3    | 4.02           |
| 10.12.85 | 49.29                  | 0.5941          | 40.6   | 9.2    | 4.41           |
| 20.12.85 | 38.51                  | 0.3132          | 40.9   | 9.7    | 4.22           |
| 13.01.86 | 52.21                  | 0.0445          | 38.7   | 6.6    | 5.86           |
| 28.01.86 | 40.70                  | 0.1581          | 40.3   | 9.0    | 4.48           |
| 13.02.86 | 51.86                  | 0.0721          | 41.3   | 8.7    | 4.75           |
| 25.02.86 | 44.38                  | 0.0850          | 24.7   | 2.7    | 9.15           |
| 11.03.86 | 9.00                   | 0.1571          | 24.1   | 4.5    | 5.36           |
| 26.03.86 | 40.84                  | 0.6194          | 43.8   | 9.6    | 4.56           |

## STAZIONE A

|                     |     |     |     |     |     |     |     |     |      |      |      |      |     |      |      |     |     |     |     |     |      |     |      |      |     |   |  |
|---------------------|-----|-----|-----|-----|-----|-----|-----|-----|------|------|------|------|-----|------|------|-----|-----|-----|-----|-----|------|-----|------|------|-----|---|--|
| :                   | 21  | 4   | 22  | 15  | 30  | 17  | 26  | 15  | 30   | 13   | 28   | 10   | 1   | 17   | 30   | 15  | 26  | 10  | 20  | 13  | 28   | 13  | 25   | 11   | 26  | : |  |
| :                   | III | IV  | IV  | V   | V   | VI  | VI  | VII | VII  | VIII | VIII | IX   | X   | X    | X    | XI  | XI  | XII | XII | I   | I    | II  | II   | III  | III | : |  |
| :                   | 85  | 85  | 85  | 85  | 85  | 85  | 85  | 85  | 85   | 85   | 85   | 85   | 85  | 85   | 85   | 85  | 85  | 85  | 85  | 86  | 86   | 86  | 86   | 86   | 86  | : |  |
| :                   | CC   | CC   | CC   | CC   | CC  | CC   | CC   | CC  | CC  | CC  | CC  | CC  | CC   | CC  | CC   | CC   | CC  | : |  |
| :                   | 2.4 | 3.3 | 2.8 | 2.7 | 1.2 | 0.6 | 5.5 | 1.1 | 20.8 | 3.2  | 15.0 | 15.9 | 7.7 | 20.2 | 10.5 | 3.1 | 8.9 | 2.1 | 3.9 | 4.6 | 10.0 | 4.6 | 12.3 | 33.8 | 3.7 | : |  |
| <hr/>               |     |     |     |     |     |     |     |     |      |      |      |      |     |      |      |     |     |     |     |     |      |     |      |      |     |   |  |
| :SIFONOFORI         | 1   |     |     |     | 1   |     |     |     | 1    | 2    |      | 1    |     | 2    | 2    | 3   | 3   |     | 1   |     |      | 1   |      |      |     | : |  |
| :LARVE POLICHETI    |     |     |     |     |     |     |     |     |      |      | 1    |      |     |      |      | 1   |     | 2   |     |     |      | 3   |      |      | 1   | : |  |
| :CLADOCERI          | 2   | 10  | 68  | 32  | 112 | 87  | 110 | 119 | 107  | 356  | 429  | 284  | 103 | 9    |      |     |     | 10  | 3   |     |      |     |      |      | 12  | : |  |
| :LARVE DECAPODI     | 5   | 1   |     |     |     |     |     |     |      |      |      |      |     |      |      |     |     |     |     |     |      |     | 4    |      | 1   | : |  |
| :PTEROPODI          |     |     |     |     |     |     | 5   | 1   |      |      |      |      | 3   | 2    |      |     | 11  |     | 14  | 4   |      |     |      |      |     | : |  |
| :LARVE BRIOZOI      |     |     | 1   | 3   |     |     |     |     |      |      |      |      |     |      |      |     |     |     |     |     |      |     |      |      |     | : |  |
| :LARVE MOLLUSCHI    |     |     | 3   |     | 5   |     | 3   |     |      | 1    |      |      |     | 1    | 1    | 5   | 4   |     |     |     | 1    | 1   | 6    |      | 8   | : |  |
| :CHETOGNATI         |     |     |     |     |     |     | 2   | 1   | 13   | 24   |      |      |     | 5    | 2    |     |     | 2   |     |     |      | 1   |      |      |     | : |  |
| :LARVE ECHINODERMI  |     |     |     |     |     |     |     |     |      |      |      |      |     |      | 2    |     |     |     |     |     |      |     |      |      |     | : |  |
| :APPENDICOLARIE     | 13  | 23  | 2   | 12  | 8   | 9   | 6   |     | 64   | 28   | 30   | 53   | 24  | 3    | 37   | 59  | 55  | 21  | 18  | 7   | 2    | 6   | 79   | 339  | 95  | : |  |
| :DOLIDI             |     |     |     |     |     |     | 4   |     |      |      |      |      |     |      |      | 2   |     |     | 3   |     |      |     |      |      |     | : |  |
| :LARVE E UOVA PESCI | 1   |     |     |     |     | 1   | 1   | 32  | 4    | 1    | 2    |      |     |      |      | 2   | 3   | 2   | 3   |     |      |     |      | 9    |     | : |  |
| :LARVE IGNOTE       |     |     |     |     |     |     | 5   |     |      |      |      |      |     | 1    |      |     |     |     |     |     |      | 1   |      |      | 2   | : |  |
| :ALTRI              |     |     |     |     |     |     |     |     |      |      |      |      |     |      |      |     |     |     |     |     |      |     |      |      |     | : |  |
| :COPEPODI           |     |     |     |     |     |     |     |     |      |      |      |      |     |      |      |     |     |     |     |     |      |     |      |      |     | : |  |
| : CALANUS           |     |     |     |     |     |     |     |     |      |      |      |      |     |      |      |     |     |     |     |     |      |     |      |      |     | : |  |
| : EUCALANUS         |     |     |     |     |     |     |     |     |      |      |      |      |     |      |      |     |     |     |     |     |      |     |      |      |     | : |  |
| : PARACALANUS       | 126 | 32  | 2   | 47  | 77  | 10  | 1   | 117 | 5    | 82   | 1    | 3    |     | 1    | 3    |     | 8   | 103 | 2   | 6   | 9    | 56  | 11   | 5    | 11  | : |  |
| : CLAUDOCALANUS     | 41  | 2   | 5   | 13  | 8   |     | 1   |     | 45   | 2    | 4    | 19   | 2   | 4    | 15   | 54  | 7   | 204 | 54  | 13  | 57   | 4   | 1    | 3    | 1   | : |  |
| : CALOCALANUS       |     |     |     |     |     |     |     |     |      |      |      |      |     |      | 1    | 1   | 3   | 1   | 5   | 1   | 2    | 4   |      |      |     | : |  |
| : TEMORA            |     |     |     |     |     |     | 1   |     |      |      |      |      |     | 6    | 8    | 7   | 4   | 3   | 2   |     | 2    | 1   |      |      |     | : |  |
| : PLEUROMANNA       | 1   |     |     |     |     |     |     |     |      |      |      |      |     |      |      |     |     |     |     |     |      |     |      |      |     | : |  |
| : CENTROPAGES       | 14  | 20  |     | 12  | 16  | 7   |     |     | 3    | 15   | 2    |      |     | 10   | 1    | 12  | 15  | 5   | 1   | 2   | 4    | 2   |      |      |     | : |  |
| : ISIAS             |     |     |     |     |     |     |     |     |      |      |      |      |     |      |      |     |     | 4   |     |     |      |     |      |      |     | : |  |
| : PONTELLA          | 1   |     |     |     |     |     |     |     |      |      | 1    | 1    |     |      |      |     |     | 2   |     |     |      |     |      |      |     | : |  |
| : PONTELLIDAE       |     |     |     |     |     |     |     |     |      |      |      |      |     |      |      |     | 1   | 1   |     |     |      | 1   |      | 1    |     | : |  |
| : ACARTIA           | 7   | 63  | 27  | 67  | 9   | 97  | 114 |     |      |      | 17   |      |     |      |      |     | 2   | 2   |     | 8   | 1    |     | 3    | 61   |     | : |  |
| : OITHONA           | 8   | 8   | 88  | 6   | 2   | 3   | 2   |     | 2    | 4    |      |      |     |      |      |     | 57  | 16  | 28  | 76  | 16   | 22  | 64   | 22   | 27  | : |  |
| : EUTERPINA         |     |     |     |     |     |     |     |     |      |      |      |      |     |      |      |     |     |     |     |     |      |     |      | 3    |     | : |  |
| : ONCAEA            | 1   |     |     |     |     |     |     |     |      |      |      |      |     |      |      |     |     |     |     | 2   |      | 2   |      |      |     | : |  |
| : CORYCAEUS         |     |     |     |     |     |     |     |     | 20   | 3    | 6    | 9    | 2   | 16   | 21   | 18  | 15  | 10  | 9   | 10  | 4    | 7   | 31   | 8    | 4   | : |  |
| : CORYCELLA         | 3   |     |     |     |     |     |     |     |      |      |      |      |     |      |      |     |     |     |     |     |      |     |      |      |     | : |  |
| : COPEPODITI        |     |     |     |     |     |     |     |     | 2    | 4    | 2    |      |     |      | 2    | 4   | 1   | 3   |     | 1   |      | 3   | 1    |      | 2   | : |  |
| : NAUPLI            | 1   | 1   |     | 1   | 2   | 1   |     |     | 1    |      |      | 1    | 3   |      |      |     | 1   | 4   | 1   |     |      | 2   | 1    | 6    | 1   | : |  |

## STAZIONE D

|                    |     |     |     |     |     |     |     |      |      |      |     |     |     |     |     |     |     |     |     |     |     |      |      |     |   |  |  |
|--------------------|-----|-----|-----|-----|-----|-----|-----|------|------|------|-----|-----|-----|-----|-----|-----|-----|-----|-----|-----|-----|------|------|-----|---|--|--|
| 21                 | 4   | 22  | 15  | 30  | 17  | 26  | 15  | 30   | 13   | 28   | 10  | 1   | 17  | 30  | 15  | 26  | 10  | 20  | 13  | 28  | 13  | 25   | 11   | 26  | : |  |  |
| III                | IV  | IV  | V   | V   | VI  | VI  | VII | VII  | VIII | VIII | IX  | X   | X   | X   | X   | XI  | XI  | XII | I   | I   | I   | I    | III  | III | : |  |  |
| 85                 | 85  | 85  | 85  | 85  | 85  | 85  | 85  | 85   | 85   | 85   | 85  | 85  | 85  | 85  | 85  | 85  | 85  | 85  | 86  | 86  | 86  | 86   | 86   | 86  | : |  |  |
| cc                 | cc  | cc  | cc  | cc  | cc  | cc  | cc  | cc   | cc   | cc   | cc  | cc  | cc  | cc  | cc  | cc  | cc  | cc  | cc  | cc  | cc  | cc   | cc   | cc  | : |  |  |
| 1.7                | 9.1 | 2.9 | 1.1 | 1.0 | 0.6 | 0.7 | 4.9 | 10.5 | 6.5  | 2.6  | 5.2 | 4.5 | 4.0 | 2.7 | 2.2 | 7.5 | 1.0 | 1.9 | 7.8 | 2.1 | 2.9 | 38.7 | 11.8 | 1.3 | : |  |  |
| <hr/>              |     |     |     |     |     |     |     |      |      |      |     |     |     |     |     |     |     |     |     |     |     |      |      |     |   |  |  |
| SIFONOFORI         |     |     |     |     |     |     |     |      |      |      |     |     |     |     |     |     |     |     |     |     |     |      |      |     |   |  |  |
| LARVE POLICHETI    |     |     |     |     |     |     |     |      |      |      |     |     |     |     |     |     |     |     |     |     |     |      |      |     |   |  |  |
| 2                  | 12  | 3   | 6   | 153 | 40  | 9   | 79  | 61   | 122  | 49   | 63  | 71  | 60  | 14  | 4   | 3   | 3   | 3   |     |     |     | 2    |      |     | : |  |  |
| 3                  |     |     | 2   |     |     |     |     |      |      |      | 1   |     |     |     |     | 1   |     | 1   |     | 1   | 2   |      |      | 9   | : |  |  |
| LARVE DECAPODI     |     |     |     |     |     |     |     |      |      |      |     |     |     |     |     |     |     |     |     |     |     |      |      |     |   |  |  |
| PTEROPODI          |     |     |     |     |     |     |     |      |      |      |     |     |     |     |     |     |     |     |     |     |     |      |      |     |   |  |  |
|                    |     |     |     |     |     |     |     |      | 16   |      | 4   | 6   | 1   | 1   |     |     | 2   | 3   |     |     |     |      |      |     | : |  |  |
| LARVE BRIOZOI      |     |     |     |     |     |     |     |      |      |      |     |     |     |     |     |     |     |     |     |     |     |      |      |     |   |  |  |
| 1                  | 21  | 8   | 3   |     |     | 1   |     |      |      |      |     |     |     |     |     |     |     |     |     |     |     |      |      |     | : |  |  |
| 1                  | 1   |     | 23  |     | 4   | 4   | 1   | 5    | 7    | 1    |     | 2   | 2   |     |     | 2   |     |     |     | 9   | 2   | 15   | 5    | :   |   |  |  |
| LARVE MOLLUSCHI    |     |     |     |     |     |     |     |      |      |      |     |     |     |     |     |     |     |     |     |     |     |      |      |     |   |  |  |
| CHETOGNATI         |     |     |     |     |     |     |     |      |      |      |     |     |     |     |     |     |     |     |     |     |     |      |      |     |   |  |  |
|                    |     |     |     | 1   |     | 1   | 1   | 1    | 5    | 9    | 1   | 2   |     |     |     | 4   | 4   | 3   |     |     |     |      |      |     | : |  |  |
| LARVE ECHINODERMI  |     |     |     |     |     |     |     |      |      |      |     |     |     |     |     |     |     |     |     |     |     |      |      |     |   |  |  |
| 3                  | 14  | 37  | 7   | 37  | 22  | 50  | 132 | 141  | 38   | 102  | 152 | 146 | 62  | 30  | 18  | 12  | 11  | 4   | 2   |     | 343 | 421  | 15   | :   |   |  |  |
| APPENDICOLARIE     |     |     |     |     |     |     |     |      |      |      |     |     |     |     |     |     |     |     |     |     |     |      |      |     |   |  |  |
| DOLIOLI            |     |     |     |     |     |     |     |      |      |      |     |     |     |     |     |     |     |     |     |     |     |      |      |     |   |  |  |
|                    |     |     |     |     |     |     |     |      |      |      | 2   | 20  | 5   | 2   |     |     |     |     |     |     |     |      |      |     | : |  |  |
| LARVE E UOVA PESCI |     |     |     |     |     |     |     |      |      |      |     |     |     |     |     |     |     |     |     |     |     |      |      |     |   |  |  |
| 1                  |     |     |     | 1   | 1   | 3   | 1   | 17   | 6    |      |     |     |     |     |     |     |     |     |     |     |     | 8    |      |     | : |  |  |
| LARVE IGNOTE       |     |     |     |     |     |     |     |      |      |      |     |     |     |     |     |     |     |     |     |     |     |      |      |     |   |  |  |
|                    |     |     |     | 7   |     | 2   |     | 2    | 1    | 1    | 1   | 4   | 4   |     |     |     |     |     |     | 3   | 2   |      |      |     | : |  |  |
| ALTRI              |     |     |     |     |     |     |     |      |      |      |     |     |     |     |     |     |     |     |     |     |     |      |      |     |   |  |  |
| COPEPODI           |     |     |     |     |     |     |     |      |      |      |     |     |     |     |     |     |     |     |     |     |     |      |      |     |   |  |  |
|                    |     |     |     |     |     |     |     |      |      |      |     |     |     |     |     |     |     |     |     |     |     |      |      |     | : |  |  |
| CALANUS            |     |     |     |     |     |     |     |      |      |      |     |     |     |     |     |     |     |     |     |     |     |      |      |     |   |  |  |
|                    |     |     |     | 2   |     |     |     |      |      |      |     |     |     |     |     |     |     |     |     |     |     |      |      |     | : |  |  |
| EUCALANUS          |     |     |     |     |     |     |     |      |      |      |     |     |     |     |     |     |     |     |     |     |     |      |      |     |   |  |  |
|                    |     |     |     |     |     |     |     |      |      |      |     |     |     |     |     |     |     |     |     |     |     |      |      |     | : |  |  |
| 96                 | 8   | 18  | 37  | 244 | 68  | 66  | 72  | 8    | 54   | 94   | 8   | 72  | 27  | 4   | 18  | 4   | 164 | 9   | 7   | 23  | 94  | 1    | 52   | 85  | : |  |  |
| 20                 | 1   | 12  | 2   | 2   | 2   | 3   | 20  | 88   | 13   | 20   | 78  | 12  | 56  | 83  | 35  | 7   | 15  | 170 | 36  | 51  | 4   | 12   | 28   | 19  | : |  |  |
| CLAUSOCALANUS      |     |     |     |     |     |     |     |      |      |      |     |     |     |     |     |     |     |     |     |     |     |      |      |     |   |  |  |
|                    |     |     |     |     |     |     |     |      |      |      |     |     |     | 1   | 4   | 1   | 2   |     | 2   |     | 1   | 3    |      |     | : |  |  |
| CALOCALANUS        |     |     |     |     |     |     |     |      |      |      |     |     |     |     |     |     |     |     |     |     |     |      |      |     |   |  |  |
|                    |     |     |     | 1   |     |     |     |      |      |      |     | 1   | 40  | 6   | 11  |     | 9   |     |     |     |     |      |      |     | : |  |  |
| TEMORA             |     |     |     |     |     |     |     |      |      |      |     |     |     |     |     |     |     |     |     |     |     |      |      |     |   |  |  |
|                    |     |     |     |     |     |     |     |      |      |      |     |     |     |     |     |     |     |     |     |     |     |      |      |     | : |  |  |
|                    |     |     |     |     |     |     |     |      |      |      |     |     |     |     |     |     |     |     |     |     |     |      |      |     | : |  |  |
| 3                  | 1   | 18  | 7   | 10  |     |     |     | 6    | 2    | 3    | 2   | 3   | 5   | 1   | 1   | 20  | 10  | 1   |     | 10  | 1   | 9    |      |     | : |  |  |
| CENTROPAGES        |     |     |     |     |     |     |     |      |      |      |     |     |     |     |     |     |     |     |     |     |     |      |      |     |   |  |  |
|                    |     |     |     |     |     |     |     |      |      |      |     |     |     | 1   | 4   | 24  | 3   | 1   |     |     |     | 1    | 1    |     | : |  |  |
| ISIAS              |     |     |     |     |     |     |     |      |      |      |     |     |     |     |     |     |     |     |     |     |     |      |      |     |   |  |  |
|                    |     |     |     |     |     |     |     |      |      |      |     |     |     |     |     |     |     |     |     |     |     |      |      |     | : |  |  |
|                    |     |     |     |     |     |     |     |      |      |      |     |     |     |     |     |     |     |     |     |     |     |      |      |     | : |  |  |
|                    |     |     |     |     |     |     |     |      |      |      |     |     |     |     |     |     |     |     |     |     |     |      |      |     | : |  |  |
|                    |     |     |     |     |     |     |     |      |      |      |     |     |     |     |     |     |     |     |     |     |     |      |      |     | : |  |  |
|                    |     |     |     |     |     |     |     |      |      |      |     |     |     |     |     |     |     |     |     |     |     |      |      |     | : |  |  |
|                    |     |     |     |     |     |     |     |      |      |      |     |     |     |     |     |     |     |     |     |     |     |      |      |     | : |  |  |
|                    |     |     |     |     |     |     |     |      |      |      |     |     |     |     |     |     |     |     |     |     |     |      |      |     | : |  |  |
|                    |     |     |     |     |     |     |     |      |      |      |     |     |     |     |     |     |     |     |     |     |     |      |      |     | : |  |  |
|                    |     |     |     |     |     |     |     |      |      |      |     |     |     |     |     |     |     |     |     |     |     |      |      |     | : |  |  |
|                    |     |     |     |     |     |     |     |      |      |      |     |     |     |     |     |     |     |     |     |     |     |      |      |     | : |  |  |
|                    |     |     |     |     |     |     |     |      |      |      |     |     |     |     |     |     |     |     |     |     |     |      |      |     | : |  |  |
|                    |     |     |     |     |     |     |     |      |      |      |     |     |     |     |     |     |     |     |     |     |     |      |      |     | : |  |  |
|                    |     |     |     |     |     |     |     |      |      |      |     |     |     |     |     |     |     |     |     |     |     |      |      |     | : |  |  |
|                    |     |     |     |     |     |     |     |      |      |      |     |     |     |     |     |     |     |     |     |     |     |      |      |     | : |  |  |
|                    |     |     |     |     |     |     |     |      |      |      |     |     |     |     |     |     |     |     |     |     |     |      |      |     | : |  |  |
|                    |     |     |     |     |     |     |     |      |      |      |     |     |     |     |     |     |     |     |     |     |     |      |      |     | : |  |  |
|                    |     |     |     |     |     |     |     |      |      |      |     |     |     |     |     |     |     |     |     |     |     |      |      |     | : |  |  |
|                    |     |     |     |     |     |     |     |      |      |      |     |     |     |     |     |     |     |     |     |     |     |      |      |     | : |  |  |
|                    |     |     |     |     |     |     |     |      |      |      | </  |     |     |     |     |     |     |     |     |     |     |      |      |     |   |  |  |

| DATA            | TEMPERATURA ARIA |      |      |      | INSOLAZIONE |     |      |      | NEBULOSITA' |     |      |     | PLUVIOMETRIA |       |       |       |
|-----------------|------------------|------|------|------|-------------|-----|------|------|-------------|-----|------|-----|--------------|-------|-------|-------|
|                 | DECADI           |      |      |      | DECADI      |     |      |      | DECADI      |     |      |     | DECADI       |       |       |       |
|                 | I°               | II°  | III° | M    | I°          | II° | III° | M    | I°          | II° | III° | M   | I°           | II°   | III°  | TOT.  |
| 21.03.85 : 8.5  |                  |      |      |      |             |     |      | 10.0 |             |     |      |     | 16.6         |       |       |       |
| MARZO :         | 11.5             | 9.0  | 10.9 | 10.4 | 1.8         | 4.3 | 4.5  | 3.5  | 8.1         | 5.9 | 6.4  | 6.8 | 142.2        | 12.4  | 59.0  | 213.6 |
| 04.04.85 : 15.2 |                  |      |      | 9.1  |             |     |      | 5.3  |             |     |      |     | 0.0          |       |       |       |
| 22.04.85 : 16.6 |                  |      |      | 3.6  |             |     |      | 6.7  |             |     |      |     | 0.0          |       |       |       |
| APRILE :        | 13.9             | 14.5 | 14.7 | 14.3 | 4.3         | 7.7 | 5.4  | 5.8  | 7.4         | 3.2 | 5.7  | 5.4 | 15.8         | gocce | 1.2   | 17.0  |
| 15.05.85 : 14.7 |                  |      |      | 8.2  |             |     |      | 5.0  |             |     |      |     | 0.0          |       |       |       |
| 30.05.85 : 19.7 |                  |      |      | 6.3  |             |     |      | 3.7  |             |     |      |     | 0.2          |       |       |       |
| MAGGIO :        | 14.5             | 16.0 | 19.9 | 16.8 | 3.5         | 4.6 | 5.9  | 4.7  | 7.7         | 7.2 | 5.8  | 6.9 | 59.4         | 44.8  | 0.2   | 104.4 |
| 17.06.85 : 20.3 |                  |      |      | 10.5 |             |     |      | 3.1  |             |     |      |     | 10.0         |       |       |       |
| 26.06.85 : 19.8 |                  |      |      | 11.2 |             |     |      | 2.0  |             |     |      |     | 0.0          |       |       |       |
| GIUGNO :        | 21.2             | 19.6 | 20.0 | 20.3 | 7.7         | 4.4 | 8.4  | 6.8  | 4.7         | 6.4 | 3.4  | 4.8 | 0.4          | 18.6  | 46.0  | 65.0  |
| 15.07.85 : 24.9 |                  |      |      | 5.8  |             |     |      | 4.7  |             |     |      |     | 0.0          |       |       |       |
| 30.07.85 : 26.2 |                  |      |      | 1.5  |             |     |      | 8.3  |             |     |      |     | gocce        |       |       |       |
| LUGLIO :        | 23.9             | 24.9 | 25.4 | 24.7 | 8.4         | 8.0 | 8.5  | 8.3  | 3.5         | 3.1 | 2.7  | 3.1 | gocce        | 0.0   | gocce | gocce |
| 13.08.85 : 25.6 |                  |      |      | 10.4 |             |     |      | 1.3  |             |     |      |     | 0.0          |       |       |       |
| 28.08.85 : 22.1 |                  |      |      | 10.8 |             |     |      | 0.7  |             |     |      |     | 0.0          |       |       |       |
| AGOSTO :        | 22.4             | 24.6 | 23.3 | 23.4 | 9.0         | 9.8 | 9.5  | 9.4  | 3.2         | 1.7 | 1.8  | 2.2 | 15.2         | 0.0   | gocce | 15.2  |
| 10.09.85 : 22.8 |                  |      |      | 5.6  |             |     |      | 5.0  |             |     |      |     | 0.0          |       |       |       |
| SETTEMBRE :     | 21.9             | 21.6 | 21.9 | 21.8 | 6.7         | 7.6 | 8.9  | 7.7  | 3.9         | 2.5 | 2.8  | 3.1 | gocce        | 13.6  | 0.0   | 13.6  |
| 01.10.85 : 21.7 |                  |      |      | 9.8  |             |     |      | 2.7  |             |     |      |     | 0.0          |       |       |       |
| 17.10.85 : 17.4 |                  |      |      | 7.6  |             |     |      | 3.7  |             |     |      |     | 0.0          |       |       |       |
| 30.10.85 : 13.7 |                  |      |      | 0.0  |             |     |      | 10.0 |             |     |      |     | 5.8          |       |       |       |
| OCTOBRE :       | 20.2             | 18.0 | 15.3 | 17.8 | 6.4         | 6.2 | 5.6  | 6.1  | 3.8         | 4.2 | 5.8  | 4.6 | 1.4          | 0.0   | 21.6  | 23.0  |
| 13.11.85 : 8.9  |                  |      |      | 3.7  |             |     |      | 5.3  |             |     |      |     | 0.0          |       |       |       |
| 28.11.85 : 8.2  |                  |      |      | 8.2  |             |     |      | 3.7  |             |     |      |     | 9.4          |       |       |       |
| NOVEMBRE :      | 14.8             | 9.8  | 8.1  | 10.9 | 3.8         | 1.8 | 2.3  | 2.6  | 6.3         | 7.7 | 7.9  | 7.3 | 12.0         | 33.0  | 41.4  | 86.4  |
| 10.12.85 : 11.9 |                  |      |      | 0.7  |             |     |      | 9.7  |             |     |      |     | 52.2         |       |       |       |
| 20.12.85 : 9.4  |                  |      |      | 7.6  |             |     |      | 0.7  |             |     |      |     | 0.0          |       |       |       |
| DICEMBRE :      | 13.1             | 9.9  | 11.1 | 11.4 | 0.9         | 3.8 | 1.8  | 2.8  | 8.9         | 3.6 | 8.4  | 7.0 | 56.0         | 0.0   | 59.2  | 115.2 |
| 13.01.86 : 7.9  |                  |      |      | 3.4  |             |     |      | 2.7  |             |     |      |     | 0.0          |       |       |       |
| 28.01.86 : 3.9  |                  |      |      | 0.0  |             |     |      | 9.7  |             |     |      |     | 5.0          |       |       |       |
| Gennaio :       | 7.2              | 9.6  | 7.3  | 8.0  | 2.8         | 4.9 | 5.7  | 4.5  | 6.5         | 3.7 | 6.5  | 5.6 | 80.2         | 0.2   | 99.0  | 179.4 |
| 13.02.86 : 5.4  |                  |      |      | 0.7  |             |     |      | 7.0  |             |     |      |     | 0.8          |       |       |       |
| 23.02.86 : 9.5  |                  |      |      | 9.8  |             |     |      | 3.7  |             |     |      |     | 0.0          |       |       |       |
| FEBBRAIO :      | 5.1              | 6.4  | 8.3  | 6.6  | 3.1         | 2.8 | 6.0  | 3.9  | 6.2         | 6.8 | 5.3  | 6.1 | 85.6         | 59.2  | gocce | 144.8 |
| 11.03.86 : 14.5 |                  |      |      | 3.7  |             |     |      | 7.7  |             |     |      |     | 0.0          |       |       |       |
| 26.03.86 : 11.7 |                  |      |      | 11.2 |             |     |      | 1.7  |             |     |      |     | 0.0          |       |       |       |
| MARZO :         | 10.3             | 11.6 | 11.8 | 11.2 | 3.3         | 6.7 | 6.7  | 5.6  | 7.1         | 4.5 | 5.3  | 5.6 | 21.8         | 30.4  | 24.6  | 76.8  |

## RAPPORTI TECNICI DELLA CATTEDRA DI IDROBIOLOGIA E PESCOLTURA

1. 1971 - DELLA CROCE N., GALLERI G., SEMERIA V. - Caratteristiche ecologiche e popolamento zooplanctonico del porto di Genova. 1. Caratteristiche ecologiche. Catt.Idrob.Pescic.Univ.Genova, Rapp. Tecn., 1, 13 pp.
2. 1972 - ANGELINO M.I., DELLA CROCE N., DE MARCHI L. - Il pesce azzurro sul mercato ittico di Genova. Ibid., 2, 16 pp.
3. 1973 - DELLA CROCE N., DRAGO N., SALEMI PICONE P., ZUNINI SERTORIO T. - Caratteristiche ecologiche e popolamento zooplanctonico del porto di Genova. 2. Popolamento zooplanctonico. Ibid., 3, 34 pp.
4. 1974 - ZUNINI SERTORIO T., DELLA CROCE N., PACCAGNELLA B. - Ricerche sulla fauna batiale delle acque liguri tra le isobate di 500 e 1000 metri. Ibid., 4, 12 pp.
5. 1974 - ALBERTELLI G., DELLA CROCE N., DRAGO N. - Composizione qualitativa e quantitativa del "Deep Scattering Layer". Ibid., 5, 18 pp.
6. 1976 - DELLA CROCE N., GROSSO F., PREMOSELLI B. - Trasporto costiero e inquinamento nel Mar Ligure. Ibid., 6, 21 pp.
7. 1978 - ALBERTELLI G., CATTANEO M., DELLA CROCE N., DRAGO N. - Benthos della piattaforma continentale ligure (Chiavari): Ottobre 1977 - Ottobre 1978. Ibid., 7, 15 pp.
8. 1979 - DELLA CROCE N., FABIANO M., ZUNINI SERTORIO T. - Biomassa planctonica, sali nutritivi, parametri idrologici (Chiavari): Ottobre 1977 - Ottobre 1978. Ibid., 8, 14 pp.
9. 1979 - BOGLIOLO A., CEVASCO G., DELLA CROCE N., ZUNINI SERTORIO T. - Composizione qualitativa e quantitativa dello zooplancton (Chiavari). Ottobre 1977 - Ottobre 1978. Ibid., 9, 14 pp.
10. 1980 - ALBERTELLI G., CATTANEO M., DELLA CROCE N., DRAGO N. - Benthos della piattaforma continentale ligure (Chiavari): Novembre 1978 - Gennaio 1980. Ibid., 10, 14 pp.
11. 1980 - DELLA CROCE N., FABIANO M., ZUNINI SERTORIO T. - Biomassa planctonica, sali nutritivi, parametri idrologici (Chiavari): Ottobre 1978 - Ottobre 1979. Ibid., 11, 14pp.
12. 1980 - BASSO M.P., CEVASCO M.G., DELLA CROCE N., PICONE P. - Caratteristiche ecologiche e popolamento zooplanctonico in ambienti portuali del Mar Ligure e Alto Tirreno. Ibid., 12, 48 pp.
13. 1981 - CATTANEO M., DELLA CROCE N. - Composizione qualitativa del fitoplancton di superficie (Chiavari): Novembre 1977 - Ottobre 1979. Ibid., 13, 12 pp.
14. 1981 - ALBERTELLI G., CATTANEO M., DELLA CROCE N., DRAGO N. - Benthos della piattaforma continentale ligure. Alassio-Savona-Chiavari-Corniglia (1977-1981). Ibid., 14, 28 pp.
15. 1981 - DELLA CROCE N., FABIANO M., ZUNINI SERTORIO T. - Biomassa planctonica, sali nutritivi, parametri idrologici. Alassio-Savona-Chiavari-Corniglia (1977-1981). Ibid., 15, 8 pp.

16. 1981 - DELLA CROCE N., SALEMI PICONE P., ZUNINI SERTORIO T. - Composizione qualitativa e quantitativa dello zooplancton. Alassio-Savona-Chiavari-Corniglia (1977-1981). Ibid., 16, 7 pp.
17. 1982 - CASSIANI L., DELLA CROCE N., FABIANO M., PALMERO S., ZAVATARELLI M. - Lipidi, Protidi e Glucidi nel materiale particolato e nello zooplancton. (Chiavari): Aprile 1980 - Marzo 1981. Ibid., 17, 8 pp.

RAPPORTI TECNICI DELL' ISTITUTO DI SCIENZE AMBIENTALI MARINE

18. 1983 - ALBERTELLI G., CATTANEO M., DELLA CROCE N., DRAGO N. - Macrobenthos delle isole di Capraia, Pianosa, Giglio, Montecristo, Giannutri, Elba (Arcipelago toscano). Ist. Sc. Amb. Mar., Catt. Idrob. Pescic. Univ. Genova, Rapp.Tecn., 18, 28 pp.
19. 1984 - DELLA CROCE N., GALLO A., SALEMI PICONE P., ZUNINI SERTORIO T. - Zooplancton della baia di La Spezia. Luglio 1974 - Giugno 1975. Ibid., 19, 20 pp.
20. 1985 - ALBERTELLI G., ANGELINO M.I., DELLA CROCE N. - Uova e larve di pesce nella Zona Pilota. Chiavari: Marzo 1980 - Febbraio 1982. Ibid., 20, 7 pp.
21. 1985 - DELLA CROCE N., FABIANO M., VIARENGO A. - Misure di produttività primaria. Chiavari: Aprile 1981 - Aprile 1982, Ibid., 21, 5 pp.
22. 1987 - ALBERTELLI G., DELLA CROCE N., SABBIONETA P. - Macrobenthos: Isola di Ustica, Isole Egadi - Favignana, Levanzo e Marettimo - Isole Eolie - Alicudi, Filicudi, Salina, Lipari, Vulcano, Panarea, Stromboli. Ibid., 22, 15 pp.
23. 1987 - DELLA CROCE N. - Mare e pesca (conferenze). Ibid., 23, 49 pp.
24. 1987 - DELLA CROCE N., DRAGO N., FLOCCHINI G. - Ricerche biologiche e geofisiche Campagna oceanografica N/R "Minerva" (14-31.8.1987). Ibid., 24, 12 pp.
