# Supplementary material for: A Beacon in the Dark: Grey Literature Data Mining and Machine Learning Enlightening Historical Plankton Seasonality Dynamics in the Ligurian Sea
Source: MDPI journal article supplement (doi:10.3390/d16030189), 2024-03-21
Supplement: s1 [file s1]

## FILE 2 - Predicted data

List of additional proxy used to increase the resolution and accuracy of the model retrieved from the Copernicus Marine Service (<https://marine.copernicus.eu/>)

**Product identifier:** MEDSEA\_MULTIYEAR\_PHY\_006\_004

**Product name:** Mediterranean Sea Physics Reanalysis

01/01/1987-01/01/1988

**DOI (Product):** [https://doi.org/10.25423/CMCC/MEDSEA\\_MULTIYEAR\\_PHY\\_006\\_004\\_E3R1](https://doi.org/10.25423/CMCC/MEDSEA_MULTIYEAR_PHY_006_004_E3R1)

### References:

- Escudier, R., Clementi, E., Omar, M., Cipollone, A., Pistoia, J., Aydogdu, A., Drudi, M., Grandi, A., Lyubartsev, V., Lecci, R., Cretí, S., Masina, S., Coppini, G., & Pinardi, N. (2020). Mediterranean Sea Physical Reanalysis (CMEMS MED-Currents) (Version 1) [Data set]. Copernicus Monitoring Environment Marine Service (CMEMS). [https://doi.org/10.25423/CMCC/MEDSEA\\_MULTIYEAR\\_PHY\\_006\\_004\\_E3R1](https://doi.org/10.25423/CMCC/MEDSEA_MULTIYEAR_PHY_006_004_E3R1)
- Escudier, R., Clementi, E., Cipollone, A., Pistoia, J., Drudi, M., Grandi, A., Lyubartsev, V., Lecci, R., Aydogdu, A., Delrosso, D., Omar, M., Masina, S., Coppini, G., Pinardi, N. (2021). A High Resolution Reanalysis for the Mediterranean Sea. *Frontiers in Earth Science*, 9, 1060, <https://www.frontiersin.org/article/10.3389/feart.2021.702285>, DOI=10.3389/feart.2021.702285
- Nigam, T., Escudier, R., Pistoia, J., Aydogdu, A., Omar, M., Clementi, E., Cipollone, A., Drudi, M., Grandi, A., Mariani, A., Lyubartsev, V., Lecci, R., Cretí, S., Masina, S., Coppini, G., & Pinardi, N. (2021). Mediterranean Sea Physical Reanalysis INTERIM (CMEMS MED-Currents, E3R1i system) (Version 1) [Data set]. Copernicus Monitoring Environment Marine Service (CMEMS). [https://doi.org/10.25423/CMCC/MEDSEA\\_MULTIYEAR\\_PHY\\_006\\_004\\_E3R1I](https://doi.org/10.25423/CMCC/MEDSEA_MULTIYEAR_PHY_006_004_E3R1I)

**Product identifier:** MULTIOBS\_GLO\_BIO\_CARBON\_SURFACE\_REP\_015\_008

**Product name:** Global Ocean Surface Carbon

01/01/1986-01/01/1987

01/01/1987-01/01/1988.

**DOI (product):** <https://doi.org/10.48670/moi-00047>

### References:

- Chau, T. T. T., Gehlen, M., and Chevallier, F.: A seamless ensemble-based reconstruction of surface ocean pCO<sub>2</sub> and air–sea CO<sub>2</sub> fluxes over the global coastal and open oceans, *Biogeosciences*, 19, 1087–1109, <https://doi.org/10.5194/bg-19-1087-2022>, 2022.

**Product identifier:** INSITU\_GLO\_PHY\_TS\_OA\_MY\_013\_052

**Product name:** Global Ocean- Delayed Mode gridded CORA- In-situ Observations objective analysis in Delayed Mode

01/01/1986-01/01/1987

**DOI (product):** <https://doi.org/10.17882/46219>
